# Supplementary material
Source: PubMed Central journal article supplement (PMC5470585)
Supplement: NIHMS857825-supplement-Supplemental_Digital_Content.pdf [file NIHMS857825-supplement-Supplemental_Digital_Content.pdf]

1 **SUPPLEMENTAL REFERENCES**

2 31s. McGowin CL, Radtke AL, Abraham K, et al. *Mycoplasma genitalium* infection  
3 activates cellular host defense and inflammation pathways in a 3-dimensional human  
4 endocervical epithelial cell model. J Infect Dis 2013; 207:1857-68.

5 32s. He J, Wang S, Zeng Y, et al. Binding of CD14 to *Mycoplasma genitalium*-derived  
6 lipid-associated membrane proteins upregulates TNF-alpha. Inflammation 2014; 37:322-  
7 30.

8 33s. McGowin CL, Ma L, Martin DH, et al. *Mycoplasma genitalium*-encoded MG309  
9 activates NF-kappaB via Toll-like receptors 2 and 6 to elicit proinflammatory cytokine  
10 secretion from human genital epithelial cells. Infect Immun 2009; 77:1175-81.

11 34s. Shimizu T, Kida Y, Kuwano K. A triacylated lipoprotein from *Mycoplasma*  
12 *genitalium* activates NF-kappaB through Toll-like receptor 1 (TLR1) and TLR2. Infect  
13 Immun 2008; 76:3672-8.

14 35s. You X, Wu Y, Zeng Y, et al. *Mycoplasma genitalium*-derived lipid-associated  
15 membrane proteins induce activation of MAPKs, NF-kappaB and AP-1 in THP-1 cells.  
16 FEMS Immunol Med Microbiol 2008; 52:228-36.

17 36s. Dehon PM, Hagensee ME, Sutton KJ, et al. Histological Evidence of Chronic  
18 *Mycoplasma genitalium*-Induced Cervicitis in HIV-Infected Women: A Retrospective  
19 Cohort Study. J Infect Dis 2016; 213:1828-35.

20 37s. Dehon PM, McGowin CL. *Mycoplasma genitalium* infection is associated with  
21 microscopic signs of cervical inflammation in liquid cytology specimens. J Clin  
22 Microbiol 2014; 52:2398-405.

23 38s. Manhart LE. *Mycoplasma genitalium*: An emergent sexually transmitted disease?  
24 Infect Dis Clin North Am 2013; 27:779-92.

25 39s. Iverson-Cabral SL, Astete SG, Cohen CR, et al. *mgpB* and *mgpC* sequence diversity  
26 in *Mycoplasma genitalium* is generated by segmental reciprocal recombination with  
27 repetitive chromosomal sequences. Mol Microbiol 2007; 66:55-73.

28 40s. McGowin CL, Spagnuolo RA, Pyles RB. *Mycoplasma genitalium* rapidly  
29 disseminates to the upper reproductive tracts and knees of female mice following vaginal  
30 inoculation. Infect Immun 2010; 78:726-36.

31 41s. Moller BR, Taylor-Robinson D, Furr PM, et al. Acute upper genital-tract disease in  
32 female monkeys provoked experimentally by *Mycoplasma genitalium*. Br J Exp Pathol  
33 1985; 66:417-26.

34 42s. Oakeshott P, Aghaizu A, Hay P, et al. Is *Mycoplasma genitalium* in women the  
35 "New Chlamydia?" A community-based prospective cohort study. Clin Infect Dis 2010;  
36 51:1160-6.

37 43s. Vandepitte J, Weiss HA, Kyakuwa N, et al. Natural history of *Mycoplasma*  
38 *genitalium* infection in a cohort of female sex workers in Kampala, Uganda. Sex Transm  
39 Dis 2013; 40:422-7.

40 44s. Wood GE, Iverson-Cabral SL, Patton DL, et al. Persistence, immune response, and  
41 antigenic variation of *Mycoplasma genitalium* in an experimentally infected pig-tailed  
42 macaque (*Macaca nemestrina*). Infect Immun 2013; 81:2938-51.

43 45s. Wood GE, Patton DL, Cummings PK, et al. Experimental infection of pig-tailed  
44 macaques (*Macaca nemestrina*) with *Mycoplasma genitalium*. Infect Immun 2016. doi:  
45 10.1128/IAI.00738-16.

46 46s. Campillo-Gimenez L, Casulli S, Dudoit Y, et al. Neutrophils in antiretroviral  
47 therapy-controlled HIV demonstrate hyperactivation associated with a specific IL-17/IL-  
48 22 environment. *J Allergy Clin Immunol* 2014; 134:1142-52 e5.

49 47s. Smith JA. Neutrophils, host defense, and inflammation: a double-edged sword. *J*  
50 *Leukoc Biol* 1994; 56:672-86.

51 48s. Nathan C. Neutrophils and immunity: challenges and opportunities. *Nat Rev*  
52 *Immunol* 2006; 6:173-82.

53 49s. Das K, De la Garza G, Maffi S, et al. Methionine sulfoxide reductase A (MsrA)  
54 deficient *Mycoplasma genitalium* shows decreased interactions with host cells. *PLoS*  
55 *ONE* 2012; 7:e36247.

56 50s. Martinez MA, Das K, Saikolappan S, et al. A serine/threonine phosphatase encoded  
57 by MG\_207 of *Mycoplasma genitalium* is critical for its virulence. *BMC Microbiol* 2013;  
58 13:44.

59 51s. Wu Y, Qiu H, Zeng Y, et al. *Mycoplasma genitalium* lipoproteins induce human  
60 monocytic cell expression of proinflammatory cytokines and apoptosis by activating  
61 nuclear factor kappaB. *Mediators Inflamm* 2008; 2008:195427.

62 52s. Iverson-Cabral SL, Manhart LE, Totten PA. Detection of *Mycoplasma genitalium*-  
63 reactive cervicovaginal antibodies among infected women. *Clin Vaccine Immunol* 2011;  
64 18:1783-6.

65 53s. Politch JA, Marathe J, Anderson DJ. Characteristics and quantities of HIV host cells  
66 in human genital tract secretions. *J Infect Dis* 2014; 210:S609-15.

67 54s. Pudney J, Quayle AJ, Anderson DJ. Immunological microenvironments in the  
68 human vagina and cervix: mediators of cellular immunity are concentrated in the cervical  
69 transformation zone. *Biol Reprod* 2005; 73:1253-63.

70 55s. Trifonova RT, Lieberman J, van Baarle D. Distribution of immune cells in the  
71 human cervix and implications for HIV transmission. *Am J Reprod Immunol* 2014;  
72 71:252-64.

73 56s. Svenstrup HF, Jensen JS, Gevaert K, et al. Identification and characterization of  
74 immunogenic proteins of *Mycoplasma genitalium*. *Clin Vaccine Immunol* 2006; 13:913-  
75 22.

76 57s. Wang RY, Grandinetti T, Shih JW, et al. *Mycoplasma genitalium* infection and host  
77 antibody immune response in patients infected by HIV, patients attending STD clinics  
78 and in healthy blood donors. *FEMS Immunol Med Microbiol* 1997; 19:237-45.

79 58s. Ma L, Jensen JS, Mancuso M, et al. Genetic variation in the complete MgPa operon  
80 and its repetitive chromosomal elements in clinical strains of *Mycoplasma genitalium*.  
81 *PloS ONE* 2010; 5:e15660.

82 59s. Ma L, Jensen JS, Myers L, et al. *Mycoplasma genitalium*: an efficient strategy to  
83 generate genetic variation from a minimal genome. *Mol Microbiol* 2007; 66:220-36.

84 60s. Peterson SN, Bailey CC, Jensen JS, et al. Characterization of repetitive DNA in the  
85 *Mycoplasma genitalium* genome: possible role in the generation of antigenic variation.  
86 *Proc Natl Acad Sci U S A* 1995; 92:11829-33.

87 61s. Iverson-Cabral SL, Astete SG, Cohen CR, et al. Intrastrain heterogeneity of the  
88 *mgpB* gene in *Mycoplasma genitalium* is extensive *in vitro* and *in vivo* and suggests that

89 variation is generated via recombination with repetitive chromosomal sequences. Infect  
90 Immun 2006; 74:3715-26.

91 62s. Ma L, Mancuso M, Williams JA, et al. Extensive variation and rapid shift of the  
92 MG192 sequence in *Mycoplasma genitalium* strains from patients with chronic infection.  
93 Infect Immun 2014; 82:1326-34.

94 63s. Mavedzenge SN, Van Der Pol B, Weiss HA, et al. The association between  
95 *Mycoplasma genitalium* and HIV-1 acquisition in African women. AIDS. 2012; 26:617-  
96 24.

97 64s. Vandepitte J, Weiss HA, Bukenya J, et al. Association between *Mycoplasma*  
98 *genitalium* infection and HIV acquisition among female sex workers in Uganda: evidence  
99 from a nested case-control study. Sex Transm Infect 2014; 90:545-9.

100 65s. Napierala Mavedzenge S, Muller EE, Lewis DA, et al. *Mycoplasma genitalium* is  
101 associated with increased genital HIV type 1 RNA in Zimbabwean women. J Infect Dis  
102 2015; 211:1388-98.

103 66s. Manhart LE, Mostad SB, Baeten JM, et al. High *Mycoplasma genitalium* organism  
104 burden is associated with shedding of HIV-1 DNA from the cervix. J Infect Dis 2008;  
105 197:733-6.

106 67s. Napierala Mavedzenge S, Weiss HA. Association of *Mycoplasma genitalium* and  
107 HIV infection: a systematic review and meta-analysis. AIDS 2009; 23:611-20.

108 68s. Arnold KB, Burgener A, Birse K, et al. Increased levels of inflammatory cytokines  
109 in the female reproductive tract are associated with altered expression of proteases,  
110 mucosal barrier proteins, and an influx of HIV-susceptible target cells. Mucosal Immunol  
111 2016; 9:194-205.

112 69s. Chakraborty H, Sen PK, Helms RW, et al. Viral burden in genital secretions  
113 determines male-to-female sexual transmission of HIV-1: a probabilistic empiric model.  
114 AIDS 2001; 15:621-7.

115 70s. Cummins JE, Christensen L, Lennox JL, et al. Mucosal innate immune factors in the  
116 female genital tract are associated with vaginal HIV-1 shedding independent of plasma  
117 viral load. AIDS Res Hum Retroviruses 2006; 22:788-95.

118 71s. Dahabieh MS, Ooms M, Brumme C, et al. Direct non-productive HIV-1 infection in  
119 a T-cell line is driven by cellular activation state and NFkappaB. Retrovirology 2014;  
120 11:17.

121 72s. Griffin GE, Leung K, Folks TM, et al. Activation of HIV gene expression during  
122 monocyte differentiation by induction of NF-kappa B. Nature 1989; 339:70-3.

123 73s. Gumbi PP, Nkwanyana NN, Bere A, et al. Impact of mucosal inflammation on  
124 cervical human immunodeficiency virus (HIV-1)-specific CD8 T-cell responses in the  
125 female genital tract during chronic HIV infection. J Virol 2008; 82:8529-36.

126 74s. Herold BC, Keller MJ, Shi Q, et al. Plasma and mucosal HIV viral loads are  
127 associated with genital tract inflammation in HIV-infected women. J Acquir Immune  
128 Defic Syndr 2013; 63:485-93.

129 75s. Ipp H, Zemlin AE, Erasmus RT, et al. Role of inflammation in HIV-1 disease  
130 progression and prognosis. Crit Rev Clin Lab Sci 2014; 51:98-111.

131 76s. Masson L, Passmore JA, Liebenberg LJ, et al. Genital inflammation and the risk of  
132 HIV acquisition in women. Clin Infect Dis 2015; 61:260-9.

133 77s. Roberts L, Passmore JA, Mlisana K, et al. Genital tract inflammation during early  
134 HIV-1 infection predicts higher plasma viral load set point in women. *J Infect Dis* 2012;  
135 205:194-203.

136 78s. Abbas W, Tariq M, Iqbal M, et al. Eradication of HIV-1 from the macrophage  
137 reservoir: an uncertain goal? *Viruses* 2015; 7:1578-98.

138 79s. Osman A, Bhuyan F, Hashimoto M, et al. M-CSF inhibits anti-HIV-1 activity of IL-  
139 32, but they enhance M2-like phenotypes of macrophages. *J Immunol* 2014; 192:5083-9.

140 80s. Crowe SM, Mills J, Elbeik T, et al. Human immunodeficiency virus-infected  
141 monocyte-derived macrophages express surface gp120 and fuse with CD4 lymphoid cells  
142 in vitro: a possible mechanism of T lymphocyte depletion in vivo. *Clin Immunol*  
143 *Immunopathol* 1992; 65:143-51.

144 81s. Duncan CJ, Williams JP, Schiffner T, et al. High-multiplicity HIV-1 infection and  
145 neutralizing antibody evasion mediated by the macrophage-T cell virological synapse. *J*  
146 *Virol* 2014; 88:2025-34.

147 82s. Peressin M, Proust A, Schmidt S, et al. Efficient transfer of HIV-1 in trans and in cis  
148 from Langerhans dendritic cells and macrophages to autologous T lymphocytes. *AIDS*  
149 2014; 28:667-77.

150 83s. Burgener A, McGowan I, Klatt NR. HIV and mucosal barrier interactions:  
151 consequences for transmission and pathogenesis. *Curr Opin Immunol* 2015; 36:22-30.

152 84s. Das K, De la Garza G, Siwak EB, et al. *Mycoplasma genitalium* promotes epithelial  
153 crossing and peripheral blood mononuclear cell infection by HIV-1. *Int J Infect Dis* 2014;  
154 23:31-8.

155
